# Supplementary figures and images for: Influence of the initial bonding mode of the hydrocarbyl bridge on the mechanisms and products of the electrochemical reduction of alkyne- and vinylidene dimolybdenum tris(µ-thiolate) complexes
Source: Royal Society of Chemistry journal article supplement (doi:10.1039/b614948k), 2007-01-01

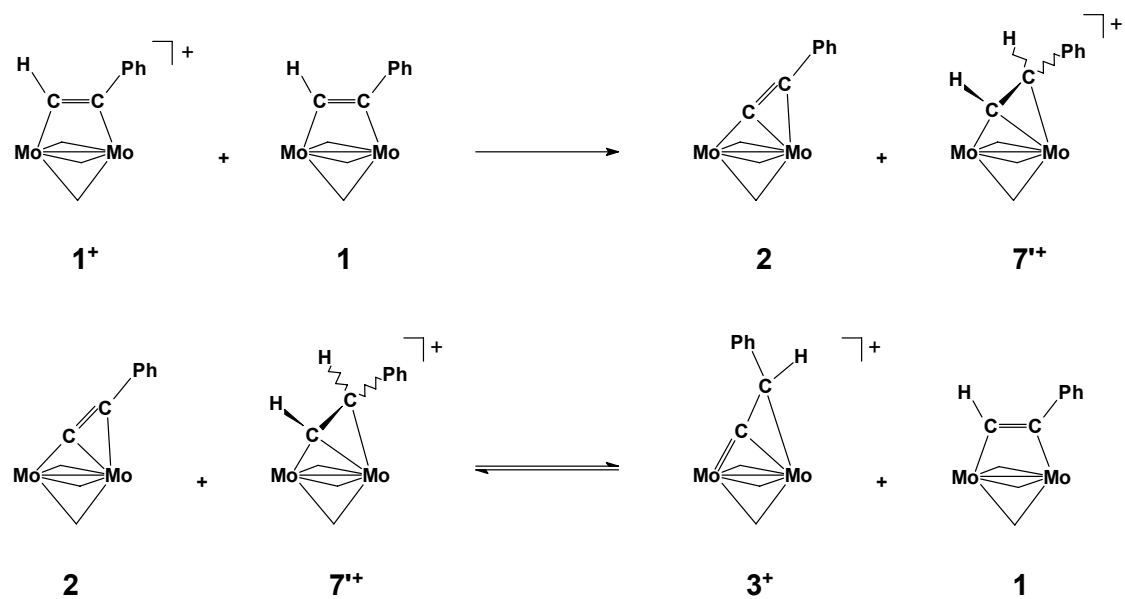

Scheme S1

Supplement: b614948k.pdf [file b614948k.pdf]
